# Supplementary material for: Feasibility Assessment of Parathyroid Hormone Adsorption by Using Polysaccharide-Based Multilayer Film Systems
Source: MDPI journal article supplement (doi:10.3390/polym13132070), 2021-06-24
Supplement: s1 [file s1]

# **Feasibility Assessment of Parathyroid Hormone Adsorption by Using Polypeptide and Polysaccharide Multilayer Film Systems**

Ruey-Shin Juang <sup>2,3</sup>, Xing Su <sup>2</sup>, and I-Chi Lee <sup>1, \*</sup>

<sup>1</sup> Department of Biomedical Engineering and Environmental Sciences, National Tsing Hua University, Hsinchu, Taiwan

<sup>2</sup> Department of Chemical and Materials Engineering, Chang Gung University, Guishan, Taoyuan 33302, Taiwan

<sup>3</sup> Department of Nephrology, Chang Gung Memorial Hospital, Linkou, Taiwan

\* Corresponding author: I-Chi Lee

E-mail: iclee@mx.nthu.edu.tw

Tel: +886-3-5715131 ext 35525

(A) Solution H<sub>2</sub>O at 60 minutes

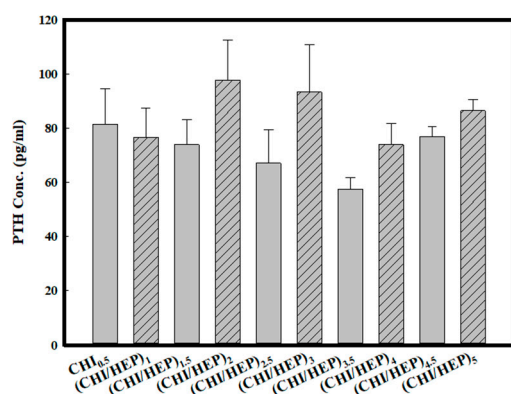

(B) Solution PBS at 60 minutes

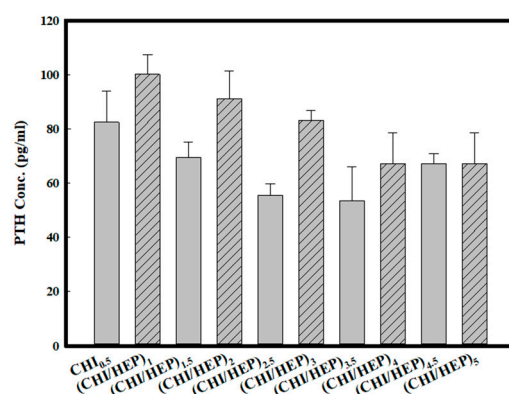

**Figure S1.** Residual PTH concentration in the solution on series of polysaccharide based multilayer films after 60 minutes of incubation. (A) H<sub>2</sub>O solution (B) PBS solution

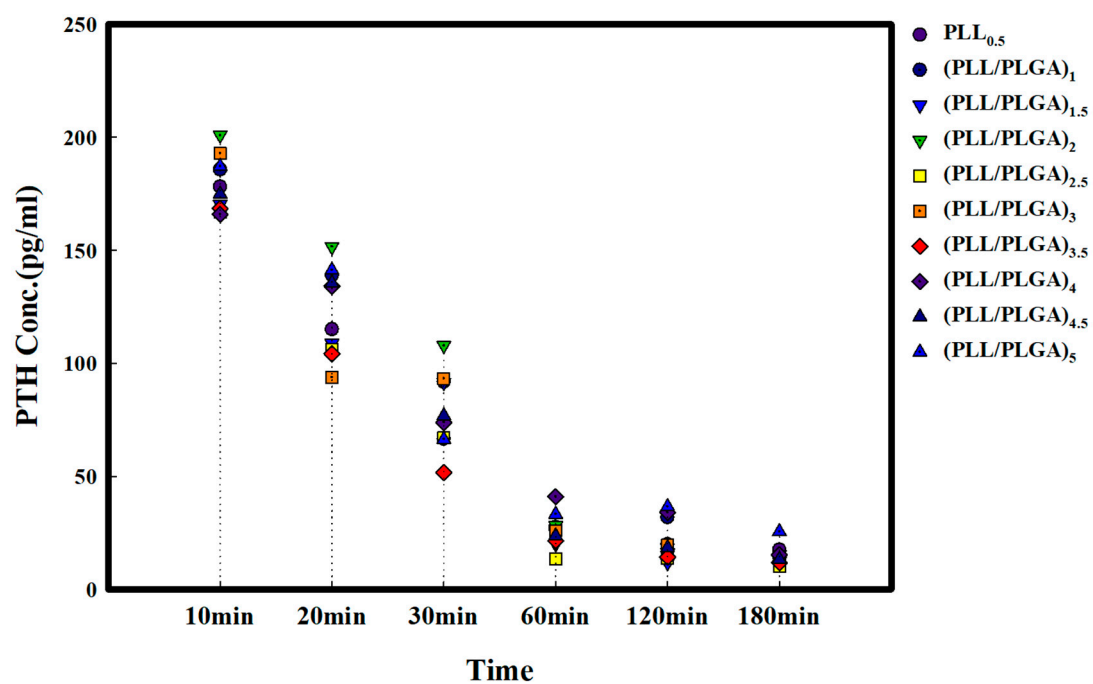

**Figure S2.** Residual PTH concentration on series of PLL/PLGA multilayer films in the PBS solution after different incubation times.

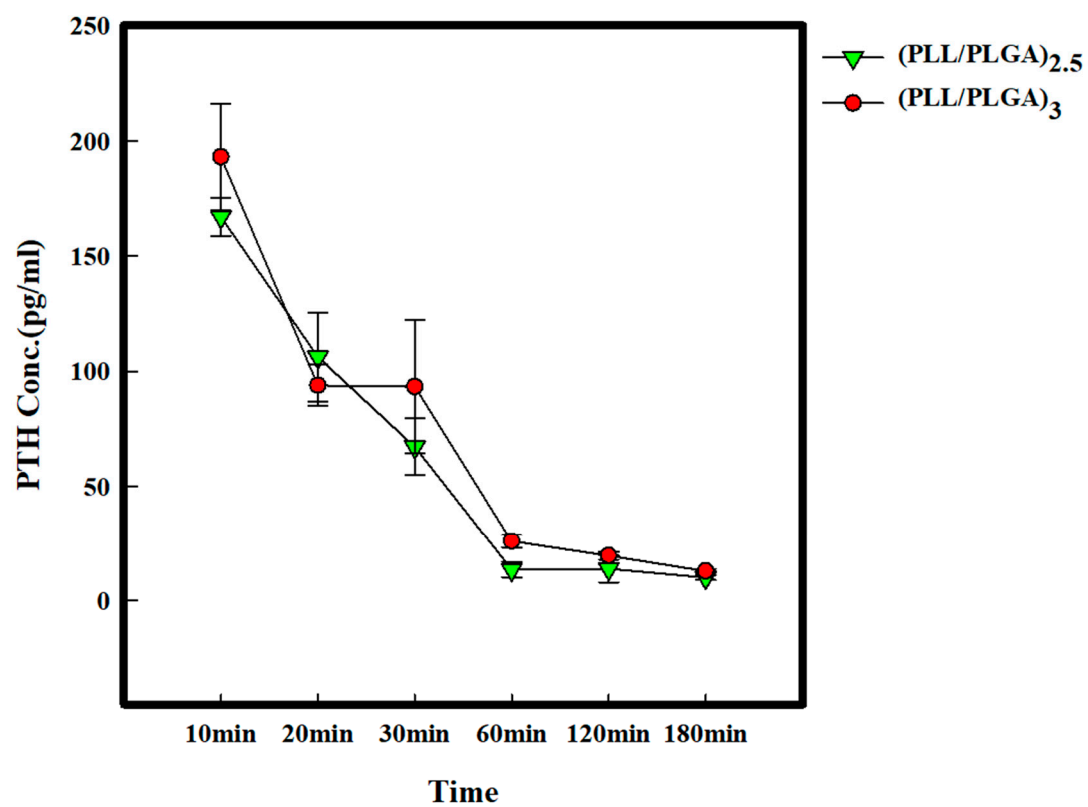

**Figure S3.** Residual PTH concentration in the PBS solution at different incubation times on the (PLL/ PLGA)<sub>2.5</sub> and (PLL/ PLGA)<sub>3</sub>.
